# Supplementary material for: Acoustic Monitoring of a Bottlenose Dolphin (Tursiops truncatus) Population: Trends in Presence and Foraging beyond the Limits of the Lower River Shannon SAC
Source: MDPI journal article supplement (doi:10.3390/jmse9060650), 2021-06-12
Supplement: s1 [file s1]

Figure S1.

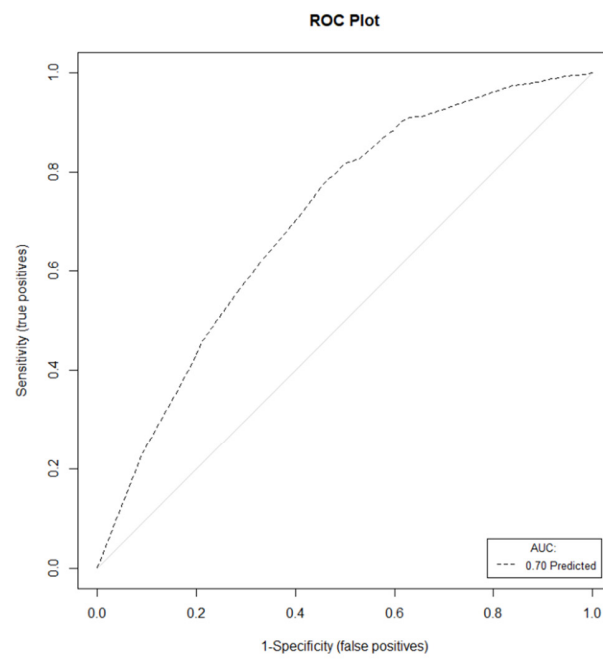

**Figure S1.** ROC plot for the final Brandon Bay Dolphin Presence GEE-GLM.

Figure S2.

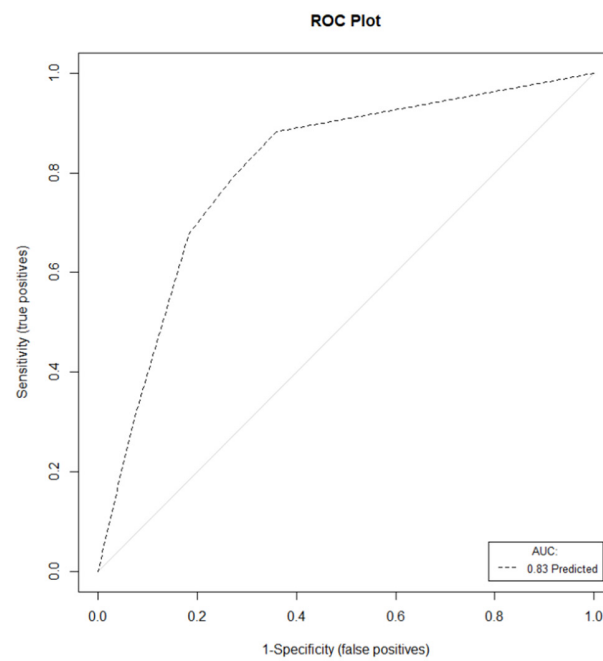

**Figure S2.** ROC plot for the final Maharees Dolphin Presence GLM.

Figure S3.

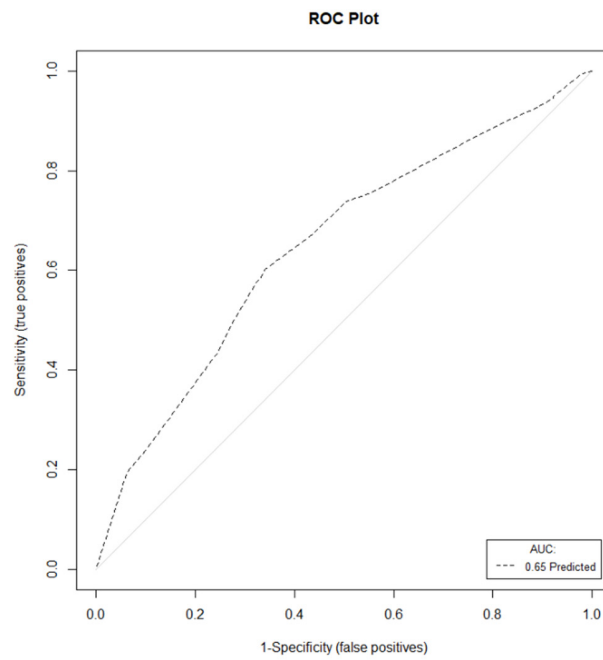

**Figure S3.** ROC plot for the final Brandon Bay Dolphin Foraging GLM.

Figure S4.

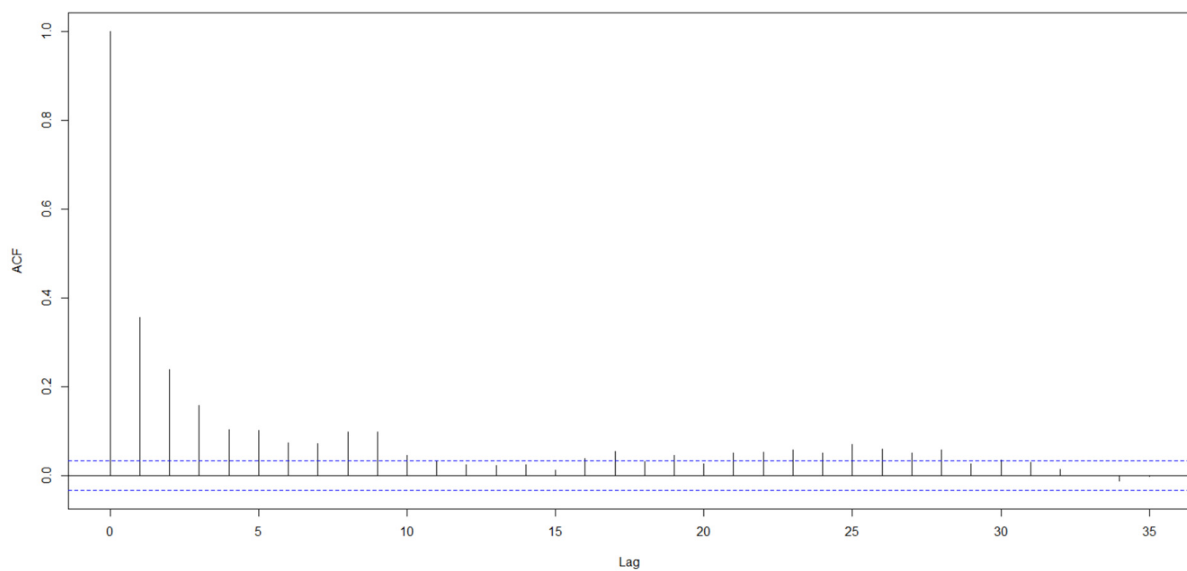

**Figure S4.** ACF plot for the Brandon Bay Dolphin Presence GLM indicating autocorrelation and the need for a GEE-GLM modelling approach.

Figure S5.

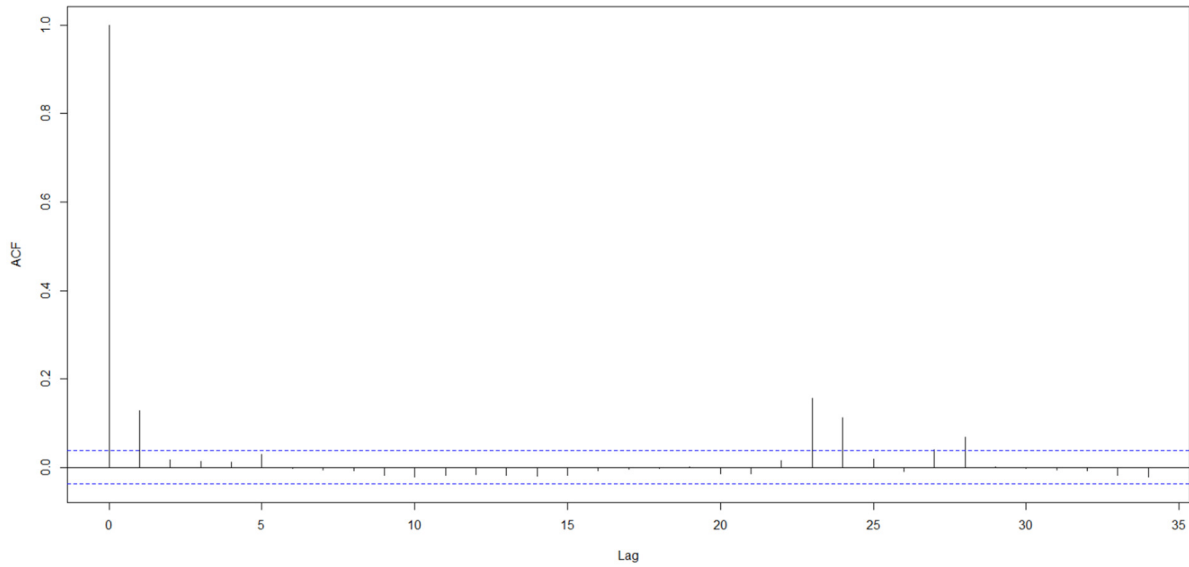

**Figure S5.** ACF plot for the Maharees Dolphin Presence GLM where no autocorrelation was detected, as few lags cross the 95% confidence bounds and the magnitude of the correlation threshold is below 0.2.

Figure S6.

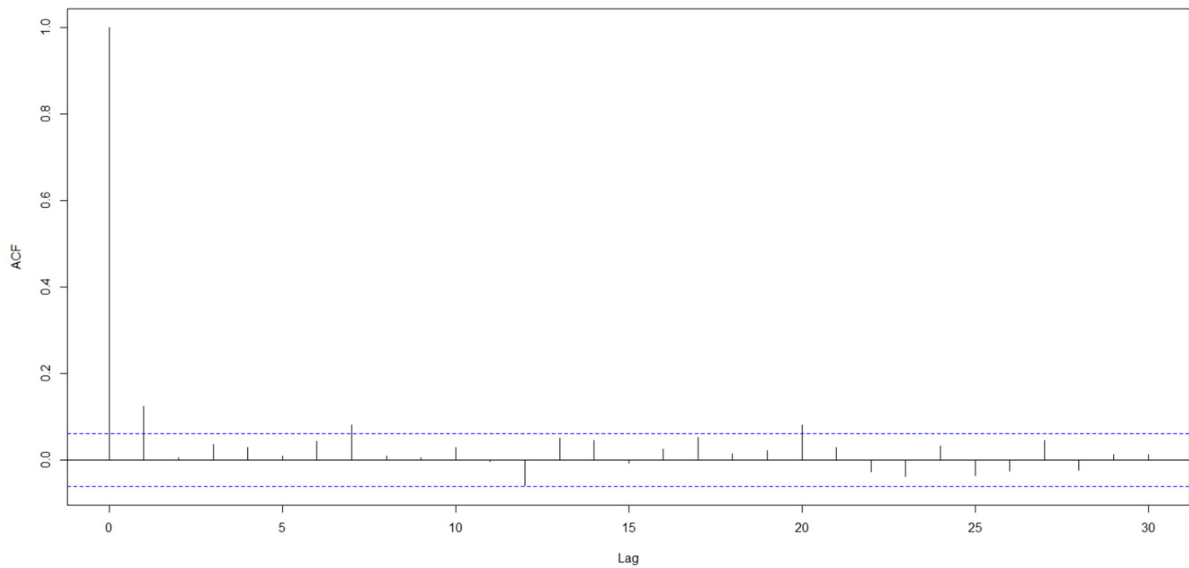

**Figure S6.** ACF plot for the Brandon Bay Dolphin Foraging GLM where no autocorrelation was detected, as few lags cross the 95% confidence bounds and the magnitude of the correlation threshold is below 0.2.
