# Supplementary material for: Acoustic Monitoring of a Bottlenose Dolphin (Tursiops truncatus) Population: Trends in Presence and Foraging beyond the Limits of the Lower River Shannon SAC
Source: MDPI journal article supplement (doi:10.3390/jmse9060650), 2021-06-12
Supplement: s1 [file s1]

Archive with 1 entries (1 files):
- jmse-1239061-supplementary.pdf
